# Supplementary material for: Analysis of a Set of KDM5C Regulatory Genes Mutated in Neurodevelopmental Disorders Identifies Temporal Coexpression Brain Signatures
Source: MDPI journal article supplement (doi:10.3390/genes12071088), 2021-07-18
Supplement: s1 [file s1]

**Supplementary Table 3 Oligonucleotides used for transcript analysis**

| Gene           | Sequence                                                                        |
|----------------|---------------------------------------------------------------------------------|
| <i>mArx</i>    | <i>F</i> 5'-GCTGGGTCTGAGCACTTTTC-3'<br><i>R</i> 5'-GGTGTGGGCTGTCTCAGG-3'        |
| <i>mSyn1</i>   | <i>F</i> 5'-CTGGGCAAATACTCAAAGGG-3'<br><i>R</i> 5'-GTCCACAGAGAATCCACCATTG-3'    |
| <i>mPhf8</i>   | <i>F</i> 5'-ACTGCCCTAACTGTGAGGTC-3'<br><i>R</i> 5'-CAAGACAAGGATAGGCACGC-3'      |
| <i>mZfp711</i> | <i>F</i> 5'-GTGATTCAAGCAGGTGGTGG-3'<br><i>R</i> 5'-TTTTCAATGGCGTGTTCCCC-3'      |
| <i>mKdm5C</i>  | <i>F</i> 5'-TTCCTTGCTACGCTCTCACTATGA-3'<br><i>R</i> 5'-TCAAATGGGCGTGTGTTACAC-3' |
| <i>hKDM5C</i>  | <i>F</i> 5'-CTCCTTGCTACGCTCCCACTACGA-3'<br><i>R</i> 5'-TCAAATGGACGTGTGTTACAC-3' |
| <i>18S</i>     | <i>F</i> 5'-CAATCCGCGGCGCTTATTCCCAT-3'<br><i>R</i> 5'-AATCTGTCAATCCTGTCCGT-3'   |
| <i>ACTB</i>    | <i>F</i> 5'-CATGTACGTTGCTATCCAGGC-3'<br><i>R</i> 5'-CTCCTTAATGTCACGCACGAT-3'    |

*F* = Forward; *R* = Reverse. m= mouse; h= human
