# Supplementary material for: Analysis of a Set of KDM5C Regulatory Genes Mutated in Neurodevelopmental Disorders Identifies Temporal Coexpression Brain Signatures
Source: MDPI journal article supplement (doi:10.3390/genes12071088), 2021-07-18
Supplement: s1 [file s1]

**Table S4.** RNA expression summary of KDM5C and its regulatory genes in the corpus callosum (from The Human Protein Atlas datasets; <https://www.proteinatlas.org/> )

| Gene          | FANTOM5*<br>FF:10042-101F6<br>(scaled tags/million) | Pig RNA-seq**<br>(pTPM; N=4) | Mouse RNA-seq***<br>(pTPM; N=3) |
|---------------|-----------------------------------------------------|------------------------------|---------------------------------|
| <i>ARX</i>    | 10.8                                                | 4.0                          | 7.4                             |
| <i>KDM5C</i>  | 65.7                                                | 25.8                         | 12.8                            |
| <i>PHF8</i>   | 30.6                                                | 18.0                         | 6.9                             |
| <i>ZNF711</i> | 9.5                                                 | 7.8                          | 2.1                             |

\* RNA expression obtained through Cap Analysis of Gene Expression (CAGE) generated by FANTOM5 project is reported as scaled tags per million;

\*\* RNA-seq data obtained from pig brain reported as transcripts per million protein coding genes (pTPM);

\*\*\* RNA-seq data obtained from mouse brain reported as pTPM
