# Supplementary material for: Analysis of a Set of KDM5C Regulatory Genes Mutated in Neurodevelopmental Disorders Identifies Temporal Coexpression Brain Signatures
Source: Genes (Basel). 2021 Jul 18;12(7):1088. doi: 10.3390/genes12071088 (PMC8305412; doi:10.3390/genes12071088)
Supplement: Supplementary file 1 [file genes-12-01088-s001.zip]

Archive with 5 entries (5 files):
- Figure S1-S3.pdf
- Table S1.xlsx
- Table S2.xlsx
- Table S3.pdf
- Table S4.pdf
