# Supplementary material for: Analysis of a Set of KDM5C Regulatory Genes Mutated in Neurodevelopmental Disorders Identifies Temporal Coexpression Brain Signatures
Source: Genes (Basel). 2021 Jul 18;12(7):1088. doi: 10.3390/genes12071088 (PMC8305412; doi:10.3390/genes12071088)
Supplement: Supplementary file 1 [file genes-12-01088-s001.zip › Table S1.xlsx]

## Sheet: Sheet1
Table S1. CAGE annotation from Zenbu database
KDM5C_HUMAN
FANTOM5 TSS	Cluste_ID	Promoter name	Position_Start	Position_end	Strand	Sequence	Expression/TPM
	ChrX:53211978-53263129 (-)	p1@KDM5C	53254373	53254406	(-)	TGGGGAGGGGAGACGCTGACAAACCAAGATGGC	33.24
	ChrX:53250049-53250057 (-)	p@chrX:53250049..53250057	53250049	53250057	(-)	GTTTACCC	0.03
	ChrX:53253362-53253374 (+)	p@chrX:53253362..53253374	53253362	53253374	(+)	cgctacctagtt	0.05
	ChrX:53221842-53221867 (-)	p@chrX:53221842..53221867	53221842	53221867	(-)	GGGGTGGCTGGGGCTGGGCCATCAC	0.28
UCSC_CpGisland_hg19	Name	Lenght	Position_Start	Position_end
	CpG:_92	1.043kb	53253784	53254826
Kdm5c_MOUSE
FANTOM5 TSS	Cluster_ID	Promoter name	Position_Start	Position_end	Strand	Sequence	Expression/TPM
	ChrX:148667771-148667803 (+)	p1@Kdm5c	148667771	148667803	(+)	GGGAGGGGAGACGCTGACAAACCAAGATGG	49.48 (cluster mouse 38.16)
UCSC_CpGisland_mm9	Name	Lenght	Position_Start	Position_end
	CpG:_37	380 bp	148667950	148668329
ARX_HUMAN
FANTOM5 TSS	Cluste_ID	Promoter name	Position_Start	Position_end	Strand	Sequence	Expression/TPM
	ChrX:25034067-25034088 (-)	p1@ARX	25034067	25034088	(-)	CTGCTCACTACACTTGTTACC	8.48
	ChrX:25034686-25034690 (-)	p@chrX:25034686..25034690	25034686	25034690	(-)	ACGC	0.01
	ChrX:25025329-25025375 (-)	p@chrX:25025329..25025375	25025329	25025375	(-)	ccgccgccgccgccgccgccTTCCCGAGCCTACCTCCGCCTCCGGG	0.08
	ChrX:25022484..25022496 (-)	p@chrX:25022484..25022496	25022484	25022496	(-)	GAGGTTTTCTCC	0.12
	ChrX:25022430..25022449 (-)	p@chrX:25022430..25022449	25022430	25022449	(-)	AGCCCAACCTCTTCCTCCT	0.05
	ChrX:25022374..25022378 (-)	p@chrX:25022374..25022378	25022374	25022378	(-)	TAAA	0.04
UCSC_CpGisland_hg19	Name	Lenght	Position_Start	Position_end
	CpG:_28	301 bp	25035823	25036123
	CpG:_74	1.048 kb	25033665	25034712
	CpG:_130	1.592 kb	25030462	25032053
	CpG:_43	504 bp	25025212	25025715
	CpG:_271	3.97 kb	25020238	25024207
Arx_MOUSE
FANTOM5 TSS	Cluster_ID	Promoter name	Position_Start	Position_end	Strand	Sequence	Expression/TPM
	ChrX:90531838..90531861 (+)	p1@Arx	90531838	90531861	(+)	GCTGCTCACTACACTTGTTACCG	10.53 (cluster mouse 4.25)
PHF8_HUMAN
FANTOM5 TSS	Cluste_ID	Promoter name	Position_Start	Position_end	Strand	Sequence	Expression/TPM
	ChrX:54070731..54070781 (-)	p1@PHF8	54070731	54070781	(-)	TTGAATAAACTTTATTGACTACTCCGAATTGCCTACCACCGCCACTGGGC	3.39
	ChrX:54070879..54070917(-)	p2@PHF8	54070879	54070917	(-)	GCCGCGCTCACCTCGCGAGTCCAGCCCTCATAAGATGG	4.17
	ChrX:54070360..54070387 (-)	p3@PHF8	54070360	54070387	(-)	CCTCCGCTGAGGCGCTTCGCAGTCCCG	1.98
	ChrX:54070388..54070417 (-)	p4@PHF8	54070388	54070417	(-)	TCGCCGTAGGGGCCGGAACTACCGGACGA	1.27
	ChrX:54070707..54070726 (-)	p5@PHF8	54070707	54070726	(-)	CCAGCGACTTTTCGGGCCG	0.44
	ChrX:54069253..54069274 (-)	p6@PHF8	54069253	54069274	(-)	AAAAGTGTTATTTGTGCCTAG	0.42
	ChrX:54070844..54070865 (-)	p7@PHF8	54070844	54070865	(-)	GTCTGGGTAGCGCCGCCACTC	0.36
	ChrX:54070784..54070795 (-)	p10@PHF8	54070784	54070795	(-)	ACTTCCTCATT	0.12
	ChrX:54069576..54069581 (-)	p21@PHF8	54069576	54069581	(-)	CAGTG	0.01
	ChrX:54051809..54051811 (+)	p@chrX:54051809..54051811	54051809	54051811	(+)	tg	0.62
	ChrX:53987324..53987329 (-)	p@chrX:53987324..53987329	53987324	53987329	(-)	aagga	0.21
UCSC_CpGisland_hg19	Name	Lenght	Position_Start	Position_end
	CpG:_102	999 bp	54070313	54071311
Phf8_MOUSE
FANTOM5 TSS	Cluster_ID	Promoter name	Position_Start	Position_end	Strand	Sequence	Expression/TPM
	ChrX:147955689..147955749 (+)	p1@Phf8	147955689	147955749	(+)	GGCCGGAACTACCGGACGAGCCTCCGCTGAGGCGCTTCGCAGTCCCGGAGCTAGCC	16.22 ( cluster mouse 14.12)
	ChrX:147955198..147955224 (+)	p2@Phf8	147955198	147955224	(+)	TCCGCCGCGCTCACCTCGCGAGTCCAGCC	5.12 (cluster mouse 4.27)
	ChrX:147956895..147956927 (+)	p3@Phf8	147956895	147956927	(+)	GATTCACTCTGTAAAAAGTGTTATTTGTGCC	0.93
	ChrX:147955529..147955540 (-)	p@chrX:147955529..147955540	147955529	147955540	(-)	CCGTTCGGGCC	0.24
UCSC_CpGisland_mm9	Name	Lenght	Position_Start	Position_end
	CpG:_79	922 bp	147954840	147955761
ZNF711_HUMAN
FANTOM5 TSS	Cluste_ID	Promoter name	Position_Start	Position_end	Strand	Sequence	Expression/TPM
	ChrX:84498989..84499003 (+)	p1@ZNF711	84498989	84499003	(+)	GCCTCCCAGACGCA	4.37
	ChrX:84499081..84499115 (+)	p2@ZNF711	84499081	84499115	(+)	CCCCCGCAGCCATCCAGAGCGCGGTCACAGTCCG	2.42
	ChrX:84499056..84499078 (+)	p3@ZNF711	84499056	84499078	(+)	ACCTTAAGGGATCCACAGCTGC	0.55
	ChrX:84498946..84498955 (+)	p4@ZNF711	84498946	84498955	(+)	CCTCAGCAT	0.18
	ChrX:84498924..84498935 (+)	p5@ZNF711	84498924	84498935	(+)	AGGGTAGCGTG	0.12
	ChrX:84499116..84499126 (+)	p10@ZNF711	84499116	84499126	(+)	CTggcggcac	0.04
	ChrX:84498769..84498792 (-)	p@chrX:84498769..84498792	84498769	84498792	(+)	CAAGCCCAGATCTCGGCGCGCCC	0.18
	ChrX:84526305..84526308 (+)	p@chrX:84526305..84526308	84526305	84526308	(+)	ACA	0.02
UCSC_CpGisland_hg19	Name	Lenght	Position_Start	Position_end
	CpG:_82	1.112kb	84498773	84499884
Zfp711_MOUSE
FANTOM5 TSS	Cluster_ID	Promoter name	Position_Start	Position_end	Strand	Sequence	Expression/TPM
	ChrX:109714331..109714347 (+)	p1@Zfp711	109714331	109714347	(+)	GCGCCTCCCAGACGCA	4.26
	ChrX:109714433..109714444 (+)	p2@Zfp711	109714433	109714444	(+)	GCAGCCATCCA	0.48
UCSC_CpGisland_mm9	Name	Lenght	Position_Start	Position_end
	CpG:_149	1.295 kb	109714097	109715391
