# Supplementary material for: Analysis of a Set of KDM5C Regulatory Genes Mutated in Neurodevelopmental Disorders Identifies Temporal Coexpression Brain Signatures
Source: Genes (Basel). 2021 Jul 18;12(7):1088. doi: 10.3390/genes12071088 (PMC8305412; doi:10.3390/genes12071088)
Supplement: Supplementary file 1 [file genes-12-01088-s001.zip › Table S2.xlsx]

## Sheet: Human Row data
	p1@KDM5C	p1@ARX	p1@PHF8	p2@PHF8	p1@ZNF711
Parietal lobe fetal	33.912	439.768	3.829	8.752	55.244
Temporal lobe fetal	64.54	449.089	3.976	13.033	78.533
Occipital lobe fetal	18.736	287.11	4.033	13.36	56.464
Occipital cortex newborn	33.831	115.792	3.139	10.812	32.087
Parietal lobe newborn	33.288	144.729	3.98	12.302	46.313
Putamen newborn	18.976	81.011	2.189	16.786	24.814
Thalamus newborn	22.089	0	0.713	10.688	32.065
Adult brain	35.475	39.066	7.006	1.871	5
Frontal lobe	43.938	30.009	3.355	3.862	6
Parietal lobe	45.69	41.983	4.928	6.29	8.736
Temporal lobe	56.773	34.336	6.459	3.4	3.944
Occipital lobe	27.691	74.252	3.487	3.487	5.743
Occipital cortex	50.976	54.082	4.839	5.238	7.353
Parietal cortex	33.615	42.533	4.116	2.058	15.778
Cerebellum	58.775	0.098	2.796	9.151	5.911
Hippocampus	32.31	51.628	4.524	2.933	14
Amygdala	39.745	40.393	3.526	3.596	8.8
Thalamus	27.387	14.29	5.741	2.932	7.5
Pineal gland	52.226	1.218	4.233	4.275	7.698
Pituitary gland	49.416	1.394	4.665	6.128	9.965
Putamen	36.943	20.028	3.532	2.734	6.083
Neurons	33.551	105.044	1.589	7.668	31.911
Astrocyte cerebellum	59.795	0	2.564	4.072	2.086
Astrocyte cerebral cortex	24.289	86.547	2.018	6.187	7.086

## Sheet: Normalize of Human data
Table S2. Human and murine expression data of CAGE obtained from ZENBU database.
	p1@KDM5C	p1@ARX	p1@PHF8	p2@PHF8	p1@ZNF711
Parietal lobe fetal	33.1325	97.9245	49.5153	46.1348	69.5358
Temporal lobe fetal	100	100	51.8513	74.8374	100
Occipital lobe fetal	0	63.9316	52.757	77.0298	71.1316
Occipital cortex newborn	32.9556	25.7838	38.5508	59.9464	39.2442
Parietal lobe newborn	31.7702	32.2272	51.9148	69.9363	57.8532
Putamen newborn	0.523972	18.039	23.4546	100	29.7304
Thalamus newborn	7.32032	0	0	59.115	39.2154
Adult brain	36.5448	8.69894	100	0	3.81179
Frontal lobe	55.0214	6.68219	41.9832	13.349	5.11989
Parietal lobe	58.8464	9.34848	66.9792	29.6279	8.69884
Temporal lobe	83.043	7.6457	91.3078	10.2514	2.43044
Occipital lobe	19.5507	16.5339	44.0807	10.8347	4.78371
Occipital cortex	70.3869	12.0426	65.5649	22.5746	6.88974
Parietal cortex	32.4841	9.47095	54.076	1.25377	17.9104
Cerebellum	87.4138	0.021822	33.1003	48.8099	5.00347
Hippocampus	29.635	11.4962	60.5594	7.12035	15.5847
Amygdala	45.8672	8.99443	44.7005	11.5655	8.78256
Thalamus	18.887	3.182	79.8983	7.11364	7.08203
Pineal gland	73.1159	0.271216	55.9352	16.118	7.34103
Pituitary gland	66.981	0.310406	62.7999	28.5417	10.3065
Putamen	39.7498	4.4597	44.7958	5.78612	5.22846
Neurons	32.3443	23.3905	13.9202	38.8669	39.014
Astrocyte cerebellum	89.6406	0	29.4136	14.757	0
Astrocyte cerebral cortex	12.1234	19.2717	20.7373	28.9373	6.54048

## Sheet: Mouse Row data
	p1@Kdm5c	p1@Arx	p1@Phf8	p2@Phf8	p1@Zfp711
Pituitary gland-E12	63.922	3.781	11.524	6.482	10.083
Pituitary gland-E13	61.316	3.363	9.443	6.209	2.199
Pituitary gland-E14	63.015	1.929	15.218	8.145	9.002
Pituitary gland-E15	60.473	0.177	14.365	7.271	9.576
Corpus striatum-N00	43.225	87.832	9.424	5.78	13.696
Hippocampus-N00	49.291	41.471	9.261	5.866	19.346
Visual cortex-N15	37.519	48.081	18.422	12.214	11.466
Visual cortex-N30	29.868	37.237	17.921	6.434	9.879
Visual cortex-N60-70	31.036	37.836	17.624	10.249	7.915
Medulla oblongata-N30	33.991	0.234	14.417	4.454	5.626
Diencephalon-N30	39.911	14.432	12.979	5.029	5.192
Cerebellum-N30	56.551	0	28.904	8.378	3.351
Olfactory	40.165	78.402	24.42	7.712	10.282
Cortex	33.027	23.988	17.556	5.389	5.736
Hippocampus	34.488	19.978	14.3	6.519	4.416
Corpus striatum	35.228	23.988	16.47	10.523	2.288
Diencephalon	33.038	11.221	11.221	3.74	3.74
Cerebellum	45.967	0	27.814	8.783	4.977
Neurons hippocampus	47.058	309.717	18.507	11.918	8.406
Neurons raphe	30.345	8.401	17.474	6.285	4.238
Neurons striatum	60.972	76.253	15.108	12.444	7.351
Neurons substantia nigra	35.553	6.93	18.11	6.632	3.431
Astrocytes cerebellum	29.473	163.737	9.119	3.681	0.782
Astrocytes hippocampus	25.051	121.769	9.486	3.603	0.389

## Sheet: Normalize of Mouse data 
	p1@Kdm5c	p1@Arx	p1@Phf8	p2@Phf8	p1@Zfp711
Pituitary gland-E12	100	1.22079	12.1557	32.5642	51.1368
Pituitary gland-E13	93.2958	1.08583	1.6376	29.4763	9.54792
Pituitary gland-E14	97.6666	0.622827	30.8264	51.3743	45.4344
Pituitary gland-E15	91.1271	0.0571489	26.515	41.4885	48.4623
Corpus striatum-N00	46.7546	28.3588	1.54157	24.6239	70.1957
Hippocampus-N00	62.3601	13.39	0.717715	25.5967	100
Visual cortex-N15	32.0753	15.5242	47.0205	97.3985	58.4322
Visual cortex-N30	12.3923	12.0229	44.4882	32.0213	50.0607
Visual cortex-N60-70	15.3971	12.2163	42.9871	75.1725	39.7004
Medulla oblongata-N30	22.9992	0.0755528	26.7779	9.62561	27.6257
Diencephalon-N30	38.229	4.65974	19.5097	16.1294	25.3363
Cerebellum-N30	81.0373	0	100	54.0097	15.6248
Olfactory	38.8825	25.3141	77.3364	46.4766	52.1865
Cortex	20.5192	7.74514	42.6434	20.2013	28.2059
Hippocampus	24.2777	6.4504	26.1865	32.9827	21.2428
Corpus striatum	26.1815	7.74514	37.1544	78.2717	10.0174
Diencephalon	20.5475	3.62298	10.6242	1.5496	17.6768
Cerebellum	53.8088	0	94.4908	58.5907	24.2021
Neurons hippocampus	56.6155	100	47.4501	94.0504	42.2904
Neurons raphe	13.6194	2.71248	42.229	30.3359	20.3038
Neurons striatum	92.4108	24.6202	30.2704	100	36.7252
Neurons substantia nigra	27.0176	2.23753	45.4435	34.2608	16.0468
Astrocytes cerebellum	11.3761	52.8666	0	0.882253	2.07311
Astrocytes hippocampus	0	39.3162	1.85494	0	0
